# Supplementary material for: Exploiting Urazole’s Acidity for Fabrication of Hydrogels and Ion-Exchange Materials
Source: MDPI journal article supplement (doi:10.3390/gels7040261), 2021-12-13
Supplement: s1 [file s1]

Article

# Exploiting Urazole's Acidity for Fabrication of Hydrogels and Ion-Exchange Materials

Saltuk B. Hanay <sup>1,2,3,\*</sup>, Ali Fallah <sup>1</sup>, Efsun Senturk <sup>1,3</sup>, Zeliha Yetim <sup>4</sup>, Ferdows Afghah <sup>1</sup>, Hulya Yilmaz <sup>2</sup>, Mustafa Culha <sup>2,5</sup>, Bahattin Koc <sup>1</sup>, Ali Zarrabi <sup>6</sup> and Rajender S. Varma <sup>7,\*</sup>

## Supporting Information

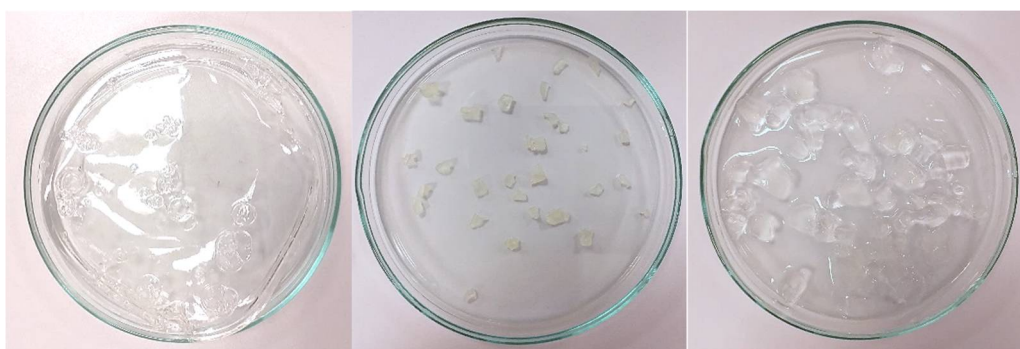

**Figure S1.** a) Semicarbazide bearing polyurea gel b) Urazole bearing gel (dried and cut into smaller pieces) c) Urazole bearing gel swollen in DI water.

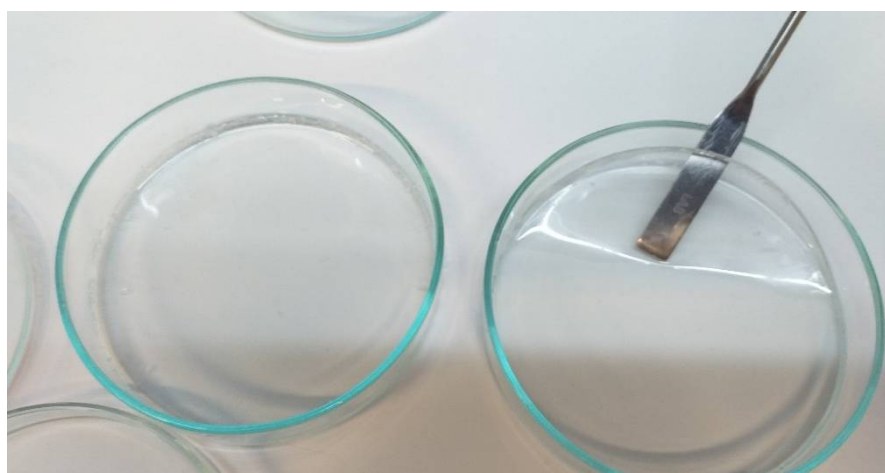

**Figure S2.** Bubble free semicarbazide gel.

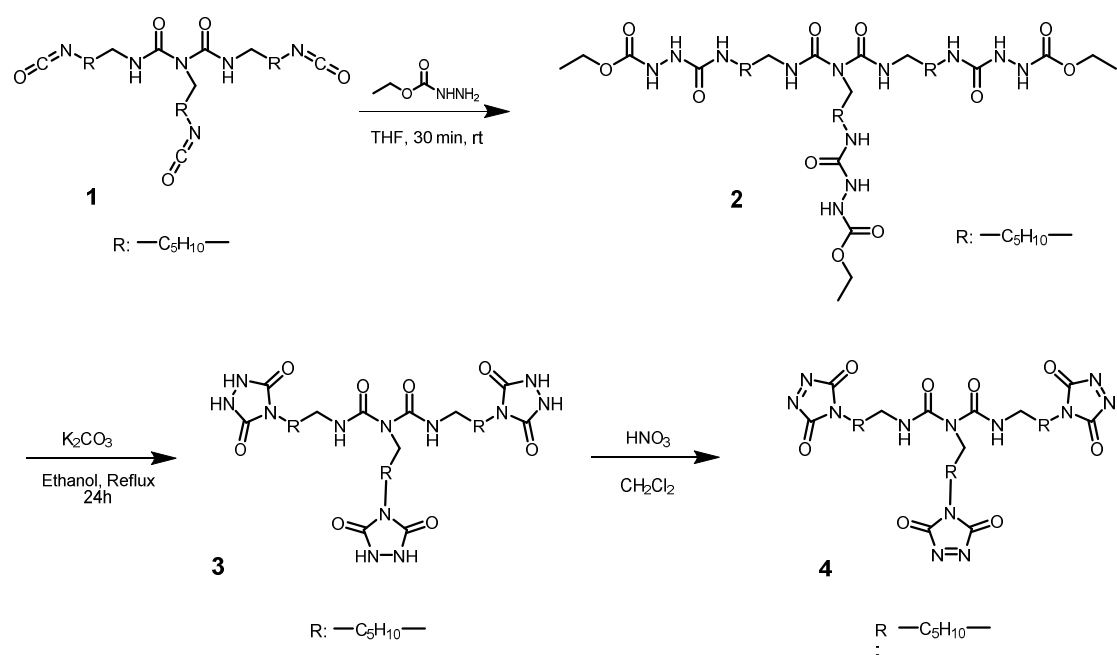

**Scheme S1.** Synthesis of poly(hexamethylene urazole) and its oxidation to TAD. Oligomers were not shown.

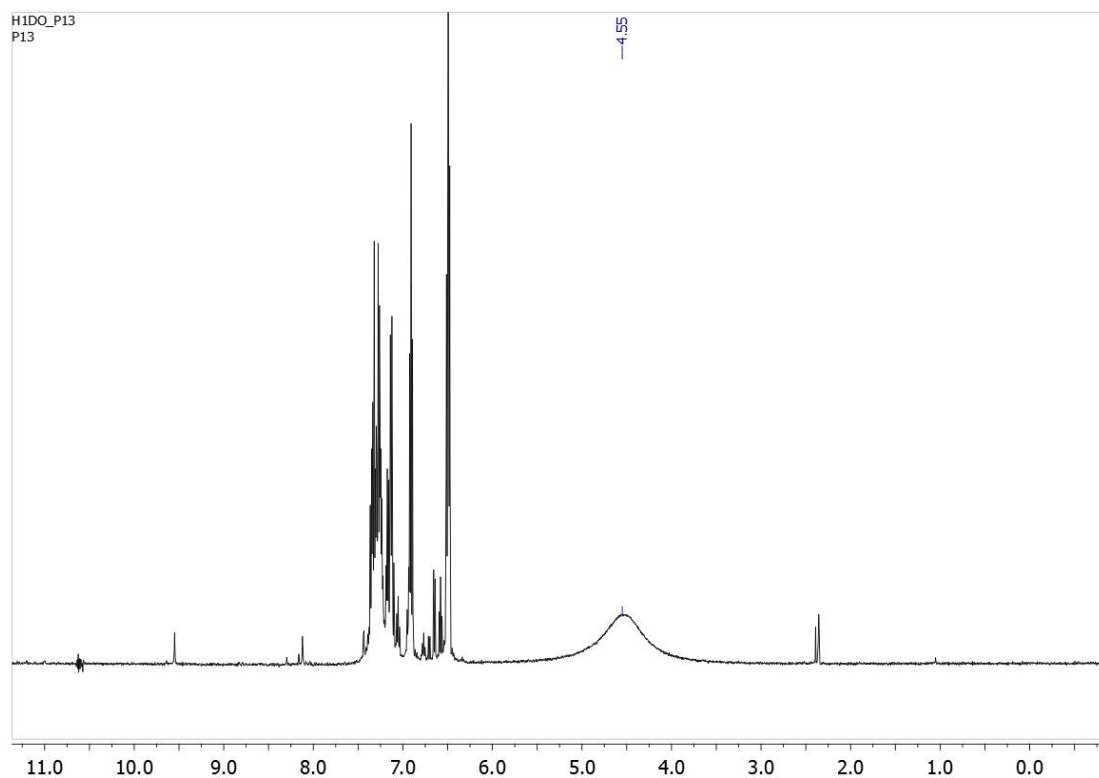

**Figure S3.**  $^1\text{H}$ -NMR of aniline – PTAD (1:1.1) adduct in  $\text{CDCl}_3$ . Peak at 4.55 is for aniline's  $\text{NH}_2$  protons (after the TAD adduct)

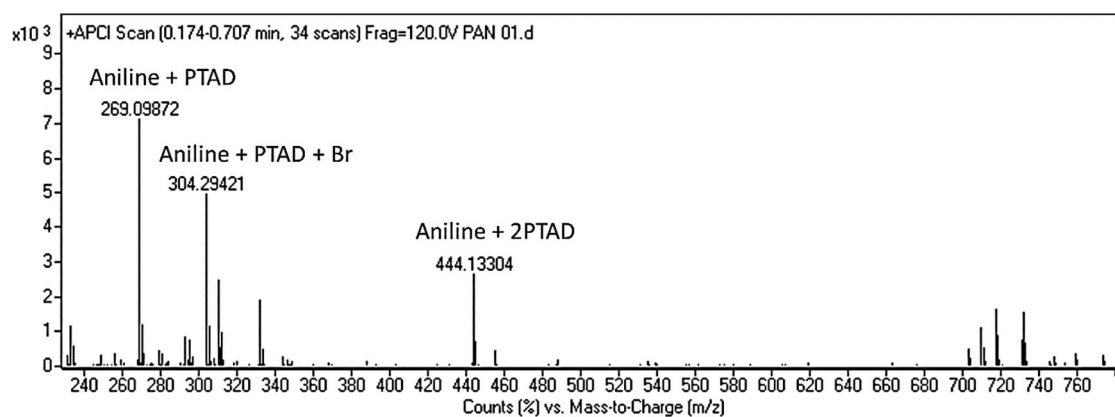

Figure S4. Mass spectrum of Aniline – PTAD adduct.

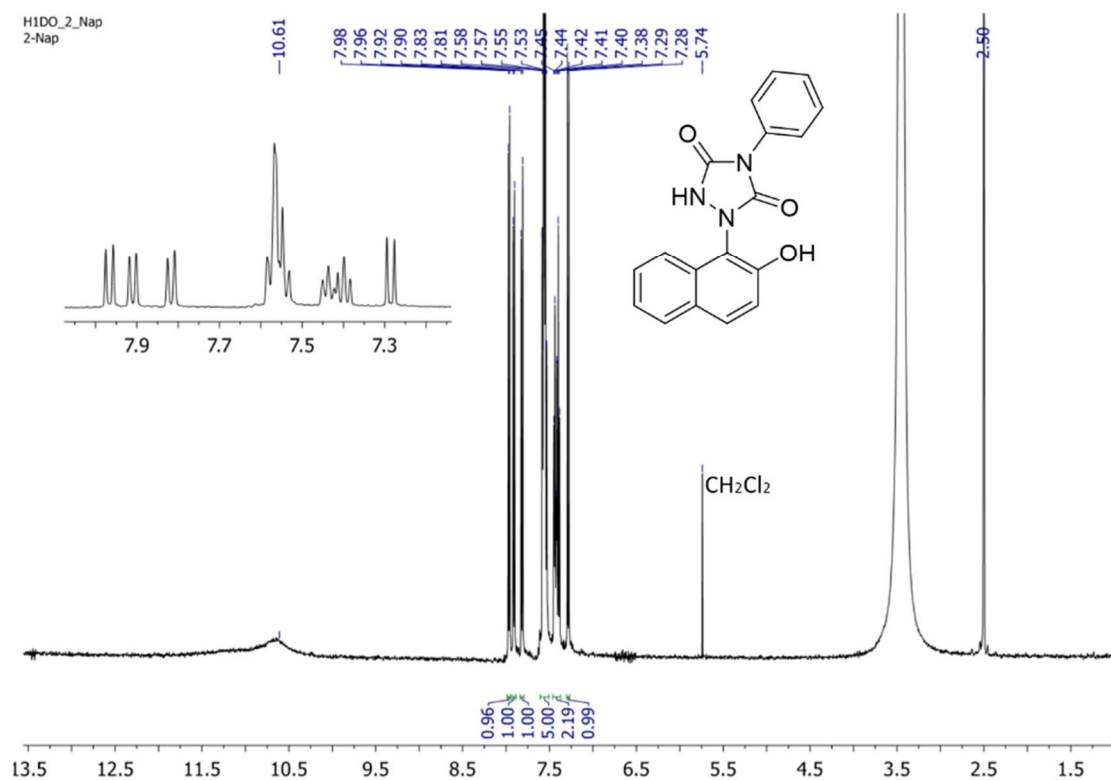

Figure S5. <sup>1</sup>H-NMR spectrum of the PTAD/2-naphthol adduct in dmsd-d<sub>6</sub>.

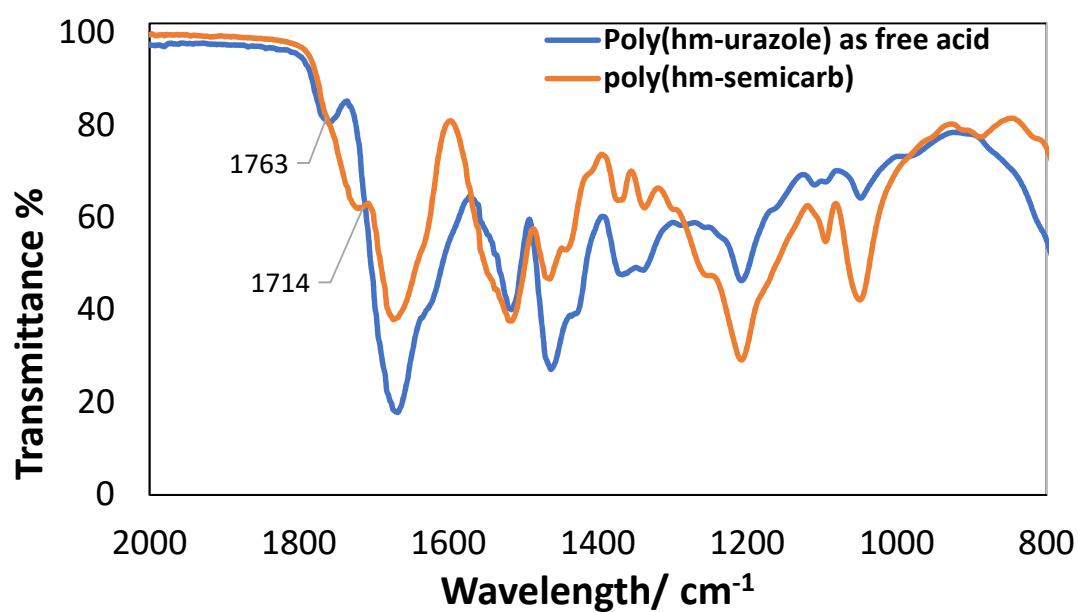

Figure S6. FT-IR spectrum of poly(hm-urazole) free acid and poly(hm-semicarbazide).

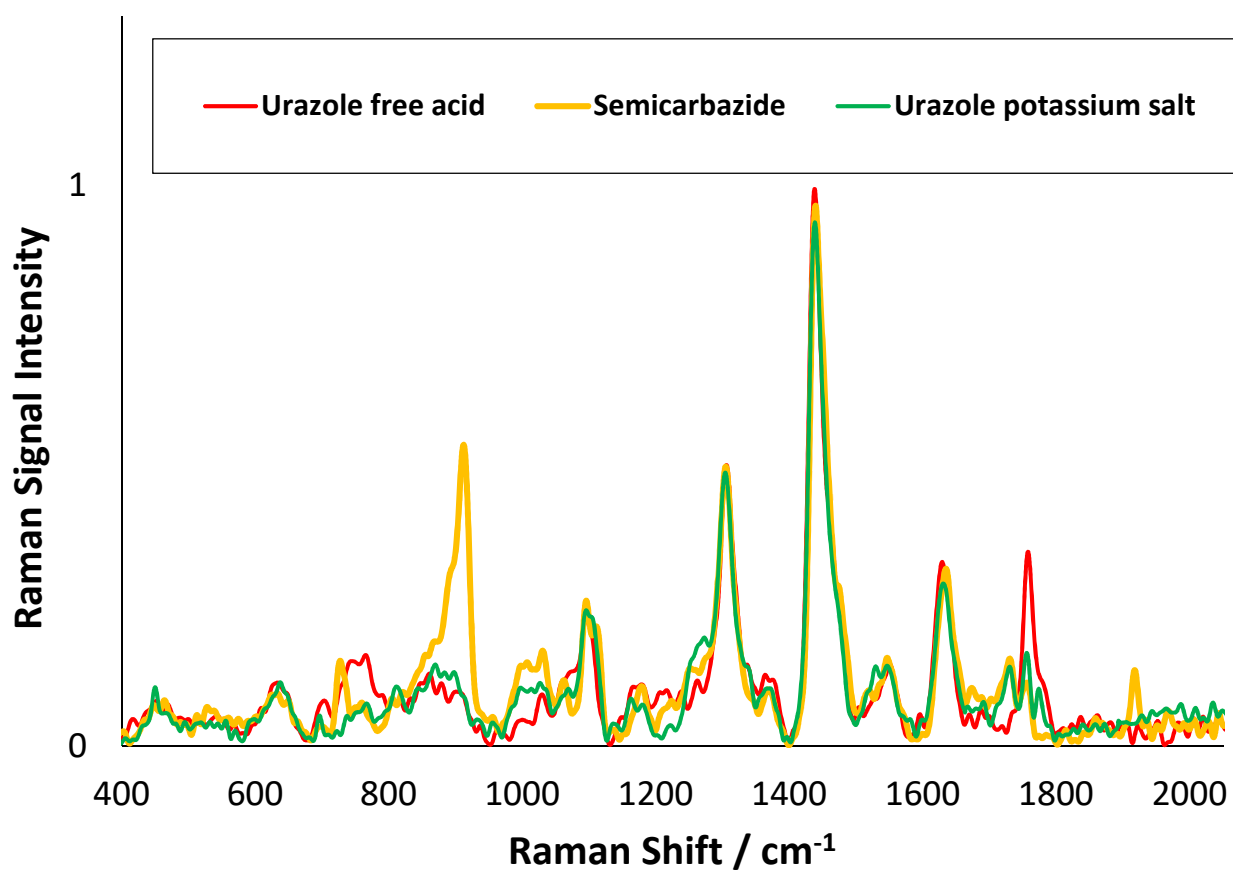

Figure S7. Raman spectrum of urazole free acid gel, semicarbazide gel and urazole potassium salt gel.

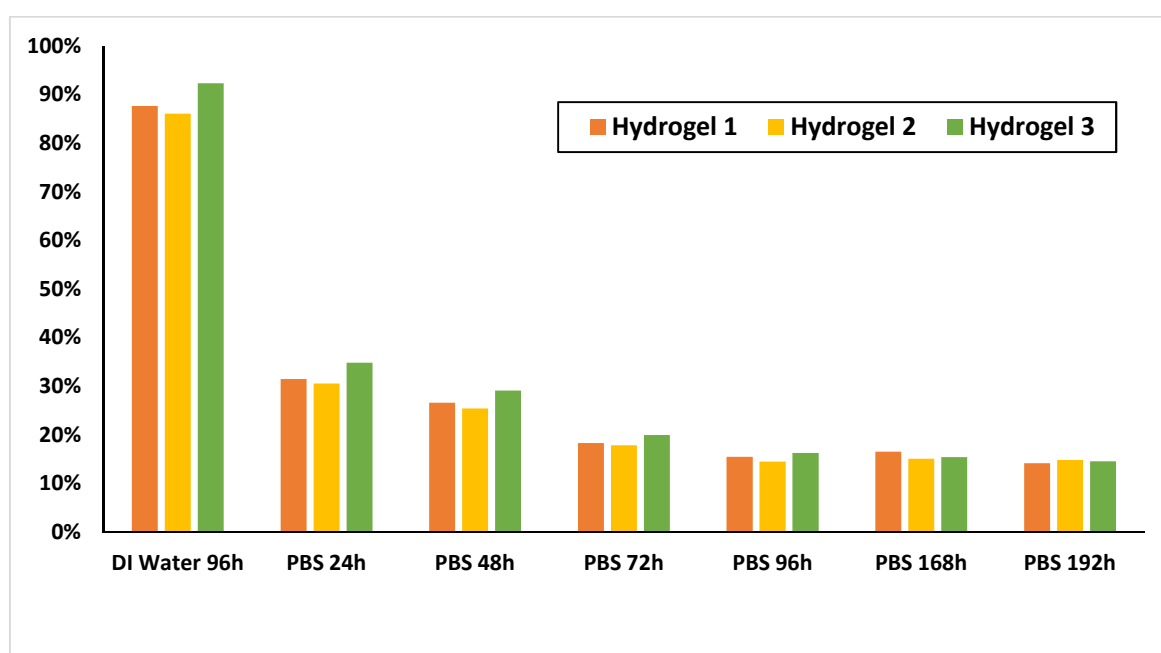

Figure S8. Swelling ratio of urazole potassium gel in PBS buffer over time.
